# Supplementary material for: Characterization of H2O2-Induced Alterations in Global Transcription of mRNA and lncRNA
Source: Antioxidants (Basel). 2022 Mar 3;11(3):495. doi: 10.3390/antiox11030495 (PMC8944526; doi:10.3390/antiox11030495)
Supplement: Supplementary file 1 [file antioxidants-11-00495-s001.zip]

Archive with 4 entries (4 files):
- Supplementary Materials/Supplemental figures and legends.pdf
- Supplementary Materials/Table S1. TF counts analysis by PROMO.xlsx
- Supplementary Materials/Table S2. TF counts analysis by TRRUST.xlsx
- Supplementary Materials/Table S3. qPCR primer list.xlsx
