# Supplementary material for: Characterization of H2O2-Induced Alterations in Global Transcription of mRNA and lncRNA
Source: Antioxidants (Basel). 2022 Mar 3;11(3):495. doi: 10.3390/antiox11030495 (PMC8944526; doi:10.3390/antiox11030495)
Supplement: Supplementary file 1 [file antioxidants-11-00495-s001.zip › Supplementary Materials/Table S1. TF counts analysis by PROMO.xlsx]

## Sheet: Sheet1
Table S1. TF counts analysis by PROMO
Promoter	HPNE lncRNA-up	HPNE lncRNA-down	HPNE mRNA-up	HPNE mRNA-down	PANC-1 lncRNA-up	PANC-1 lncRNA-down	PANC-1 mRNA-up	PANC-1 mRNA-down
AhR:Arnt [T05394]; 10	3	1	5	2	0	0	1	2
AP-1 [T00029]; 9	9	3	10	9	4	2	6	8
AP-2alphaA [T00035]; 6	94	98	210	193	44	53	138	150
AR [T00040]; 9	5	2	5	3	0	3	1	4
ATF [T00051]; 12	0	0	0	0	0	1	0	0
ATF-1 [T00968]; 11	0	0	0	0	0	0	0	3
ATF-2 [T00167]; 10	3	2	5	6	0	2	4	5
ATF3 [T01313]; 8	1	0	7	5	0	0	1	1
C/EBPalpha [T00105]; 7	31	28	64	57	25	18	42	45
C/EBPbeta [T00581]; 4	134	125	250	245	62	71	169	176
C/EBPdelta [T00583]; 14	0	0	0	0	1	0	0	0
c-Ets-1 [T00112]; 7	62	59	135	119	29	33	72	83
c-Ets-2 [T00113]; 9	2	3	3	7	2	1	3	8
c-Fos [T00123]; 10	4	6	7	9	2	2	1	4
c-Jun [T00133]; 7	38	32	65	53	17	18	37	45
c-Myb [T00137]; 8	5	8	15	14	2	5	7	10
c-Myc [T00140]; 6	43	34	71	74	22	19	41	55
COUP-TF1 [T00149]; 13	0	0	0	0	0	0	0	1
CREB [T00163]; 9	1	1	6	4	1	0	2	2
CTF [T00174]; 12	2	0	6	3	2	2	0	2
E2F [T00221]; 10	0	1	2	3	0	0	2	0
E2F-1 [T01542]; 8	4	5	18	16	3	5	13	12
EBF [T05427]; 11	2	3	3	1	2	0	0	3
ELF-1 [T01113]; 13	0	0	0	0	0	0	1	0
Elk-1 [T00250]; 9	20	22	49	45	6	10	19	22
ENKTF-1 [T00255]; 8	25	14	37	30	11	9	22	32
ER-alpha [T00261]; 5	132	121	240	235	60	63	167	164
ETF [T00270]; 11	7	3	9	12	0	1	8	8
FOXO4 [T03403]; 14	0	0	1	0	0	0	0	0
FOXP3 [T04280]; 6	109	103	228	215	54	57	146	150
GATA-1 [T00306]; 6	79	63	127	130	37	37	82	96
GATA-2 [T00308]; 9	6	4	4	3	0	3	0	4
GATA-3 [T00311]; 12	0	0	0	0	1	0	0	0
GCF [T00320]; 9	36	39	94	87	9	20	59	67
GR [T05076]; 7	110	102	209	210	57	61	145	157
GR-alpha [T00337]; 5	134	124	250	245	62	71	169	176
GR-beta [T01920]; 5	132	124	249	242	61	71	167	176
HIF-1 [T01609]; 9	2	1	4	5	0	0	3	3
HiNF-A [T00360]; 15	0	0	0	0	0	0	1	0
HMG I(Y) [T02368]; 13	0	0	0	0	0	0	1	0
HNF-1A [T00368]; 8	35	37	67	65	27	20	51	64
HNF-1B [T01950]; 9	1	2	0	0	1	0	3	4
HNF-1C [T01951]; 9	1	1	1	7	2	1	6	4
HNF-3alpha [T02512]; 8	84	82	150	148	33	46	103	112
HOXD10 [T01425]; 10	16	22	41	38	14	16	31	36
HOXD9 [T01424]; 10	16	22	41	38	14	16	31	36
HSF [T00383]; 19	1	0	0	0	0	0	0	0
Ik-1 [T02702]; 13	1	0	3	0	0	1	2	3
IRF-1 [T00423]; 9	4	9	14	13	3	7	8	13
IRF-2 [T01491]; 6	100	81	191	179	50	58	126	128
LEF-1 [T02905]; 8	3	7	11	8	1	1	7	8
MAZ [T00490]; 13	2	0	0	0	0	0	0	0
MEF-2A [T01005]; 11	1	1	0	2	0	1	0	1
NF-1 [T00539]; 8	21	26	46	51	13	14	28	29
NF-AT1 [T00550]; 9	9	8	24	24	3	7	16	12
NF-AT1 [T01948]; 10	2	0	4	3	0	2	1	4
NF-AT2 [T01945]; 10	8	3	6	7	2	4	6	6
NFI/CTF [T00094]; 8	20	15	34	47	7	11	19	27
NF-kappaB1 [T00593]; 11	0	0	2	0	1	2	1	0
NF-Y [T00150]; 8	8	5	18	20	4	3	10	9
NF-YA [T01804]; 14	0	0	2	3	0	1	1	0
p53 [T00671]; 7	84	84	169	137	40	42	89	101
Pax-5 [T00070]; 7	121	115	237	226	55	64	154	160
PEA3 [T00685]; 9	4	3	4	8	1	1	0	4
PITX2 [T02413]; 20	3	2	6	3	0	3	4	4
POU2F1 [T00641]; 11	0	0	6	2	1	3	1	1
POU2F2 (Oct-2.1) [T00646]; 11	2	4	2	2	1	0	1	3
PPAR-alpha:RXR-alpha [T05221]; 11	5	3	4	5	2	1	1	4
PR A [T01661]; 7	63	58	125	114	35	28	74	92
PR B [T00696]; 7	63	58	125	114	35	28	74	92
PXR-1:RXR-alpha [T05671]; 8	12	12	26	25	4	7	18	15
RAR-alpha1 [T00719]; 13	0	0	0	0	0	0	0	1
RAR-beta [T00721]; 10	2	1	1	3	0	0	2	2
RAR-beta:RXR-alpha [T05420]; 12	0	0	0	0	0	0	1	1
RBP-Jkappa [T01616]; 12	0	0	0	0	0	0	1	0
RelA [T00594]; 11	0	0	0	1	0	0	0	0
RXR-alpha [T01345]; 7	72	65	141	127	35	38	85	87
Sp1 [T00759]; 10	17	19	60	60	5	12	36	47
Sp3 [T02338]; 16	0	1	0	4	1	0	0	2
SRF [T00764]; 13	0	0	2	1	0	0	0	1
SRY [T00997]; 9	7	4	17	21	8	7	22	13
STAT1beta [T01573]; 10	3	5	13	18	2	3	7	11
STAT4 [T01577]; 6	87	80	172	178	43	45	111	126
T3R-beta1 [T00851]; 9	2	5	8	6	2	0	7	3
TBP [T00794]; 10	14	12	17	16	9	10	20	21
TCF-4 [T02918]; 10	0	1	3	1	0	1	0	1
TCF-4E [T02878]; 7	39	30	88	77	26	19	59	59
TFIID [T00820]; 7	121	113	236	230	60	69	157	166
TFII-I [T00824]; 6	129	120	238	232	55	67	162	170
USF1 [T00874]; 10	2	1	4	3	1	1	4	0
USF2 [T00878]; 10	2	0	3	1	0	2	0	3
VDR [T00885]; 9	0	0	5	3	0	1	4	1
WT1 [T00899]; 9	10	14	26	35	1	8	23	24
WT1 I [T01840]; 18	0	0	1	0	0	0	1	0
WT1 I -KTS [T00900]; 18	0	0	1	0	0	0	1	0
WT1 I-del2 [T01842]; 18	0	0	1	0	0	0	1	0
WT1 -KTS [T01839]; 18	0	0	1	0	0	0	1	0
WT1-del2 [T01841]; 18	0	0	1	0	0	0	1	0
XBP-1 [T00902]; 6	82	83	159	136	43	44	107	114
YY1 [T00915]; 4	134	125	251	245	62	71	169	176
