# Supplementary material for: Characterization of H2O2-Induced Alterations in Global Transcription of mRNA and lncRNA
Source: Antioxidants (Basel). 2022 Mar 3;11(3):495. doi: 10.3390/antiox11030495 (PMC8944526; doi:10.3390/antiox11030495)
Supplement: Supplementary file 1 [file antioxidants-11-00495-s001.zip › Supplementary Materials/Table S2. TF counts analysis by TRRUST.xlsx]

## Sheet: Sheet1
Table S2. TF counts analysis by TRRUST
Group	Key TF	Description	# of overlapped genes	P value	Q value	List of overlapped genes	transcript_id
HPNE up-regulated lncRNA	ATM	ataxia telangiectasia mutated	3	0.000252	0.00454	TNFRSF10B,BAX,PMAIP1	ENST00000523752,ENST00000513217,ENST00000590596
HPNE up-regulated lncRNA	SP1	Sp1 transcription factor	9	0.00145	0.00546	BAX,TNFRSF10B,CERS2,GCLC,FGFR1,GSTP1,SQSTM1,YY1,SLC3A2	ENST00000513217,ENST00000523752,ENST00000460664,ENST00000515580,ENST00000683795,ENST00000467591,ENST00000466342,ENST00000623799,ENST00000542922,ENST00000680654
HPNE up-regulated lncRNA	RELA	v-rel reticuloendotheliosis viral oncogene homolog A (avian)	7	0.00164	0.00546	NCOR2,GSTP1,TNFRSF10B,YY1,BAX,EPAS1,GCLC	TCONS_00071282,ENST00000467591,ENST00000523752,ENST00000623799,ENST00000513217,ENST00000466465,ENST00000515580
HPNE up-regulated lncRNA	NFKB1	nuclear factor of kappa light polypeptide gene enhancer in B-cells 1	7	0.0017	0.00546	BAX,GSTP1,NCOR2,GCLC,TNFRSF10B,YY1,SQSTM1	ENST00000513217,ENST00000467591,TCONS_00071282,ENST00000515580,ENST00000523752,ENST00000623799,ENST00000466342
HPNE up-regulated lncRNA	YY1	YY1 transcription factor	4	0.00179	0.00546	EPAS1,TNFRSF10B,FDPS,PARP1	ENST00000466465,ENST00000523752,ENST00000489324,ENST00000676709
HPNE up-regulated lncRNA	MYCN	v-myc myelocytomatosis viral related oncogene, neuroblastoma derived (avian)	3	0.00212	0.00546	DKK3,MCM7,BAX	ENST00000532372,ENST00000485286,ENST00000513217
HPNE up-regulated lncRNA	TP73	tumor protein p73	2	0.00239	0.00546	PMAIP1,BAX	ENST00000590596,ENST00000513217
HPNE up-regulated lncRNA	TP53	tumor protein p53	5	0.00243	0.00546	BAX,GSTP1,TNFRSF10B,PMAIP1,MCM7	ENST00000513217,ENST00000467591,ENST00000523752,ENST00000590596,ENST00000485286
HPNE up-regulated lncRNA	NFE2L2	nuclear factor (erythroid-derived 2)-like 2	2	0.00363	0.00726	SDHB,GCLC	ENST00000466613,ENST00000515580
HPNE up-regulated lncRNA	KLF6	Kruppel-like factor 6	2	0.00566	0.0102	CERS2,PMAIP1	ENST00000460664,ENST00000590596
HPNE up-regulated lncRNA	ETS1	v-ets erythroblastosis virus E26 oncogene homolog 1 (avian)	3	0.0103	0.0168	SQSTM1,PARP1,BAX	ENST00000466342,ENST00000676709,ENST00000513217
HPNE up-regulated lncRNA	HIF1A	hypoxia inducible factor 1, alpha subunit (basic helix-loop-helix transcription factor)	3	0.0117	0.0176	SDHB,BAX,ERCC2	ENST00000466613,ENST00000513217,ENST00000684264
HPNE up-regulated lncRNA	RB1	retinoblastoma 1	2	0.0133	0.0184	TGFBI,FGFR1	ENST00000514242,ENST00000683795
HPNE up-regulated lncRNA	EP300	E1A binding protein p300	2	0.0402	0.0517	YY1,PARP1	ENST00000623799,ENST00000676709
HPNE up-regulated lncRNA	ESR1	estrogen receptor 1	2	0.0693	0.0831	PMAIP1,PTMA	ENST00000590596,ENST00000481928
HPNE up-regulated lncRNA	MYC	v-myc myelocytomatosis viral oncogene homolog (avian)	2	0.11	0.124	TNFRSF10B,PMAIP1	ENST00000523752,ENST00000590596
HPNE up-regulated lncRNA	STAT3	signal transducer and activator of transcription 3 (acute-phase response factor)	2	0.193	0.204	EPAS1,TNFRSF10B	ENST00000466465,ENST00000523752
HPNE up-regulated lncRNA	JUN	jun proto-oncogene	2	0.207	0.207	GCLC,GSTP1	ENST00000515580,ENST00000467591
HPNE down-regulated lncRNA	TP53	tumor protein p53	6	0.000311	0.00295	PTTG1,PRC1,CDK4,AKT1,CTNNB1,MCM7	ENST00000523659,ENST00000560914,ENST00000556982,ENST00000552713,ENST00000682269,ENST00000643865,ENST00000489841
HPNE down-regulated lncRNA	SOX6	SRY (sex determining region Y)-box 6	2	0.000453	0.00295	CTNNB1,CDK4	ENST00000643865,ENST00000552713
HPNE down-regulated lncRNA	SATB1	SATB homeobox 1	2	0.00307	0.0128	CDK4,HDAC1	ENST00000552713,ENST00000476391
HPNE down-regulated lncRNA	BRCA1	breast cancer 1, early onset	3	0.00394	0.0128	STAT2,ASPM,JAK1	ENST00000651078,ENST00000367408,ENST00000673314
HPNE down-regulated lncRNA	NFIC	nuclear factor I/C (CCAAT-binding transcription factor)	2	0.00983	0.0256	POLD2,COL1A1	ENST00000489883,ENST00000486572
HPNE down-regulated lncRNA	AR	androgen receptor	3	0.0151	0.0328	AKT1,CTNNB1,CDH2	ENST00000682269,ENST00000643865,ENST00000676041
HPNE down-regulated lncRNA	STAT3	signal transducer and activator of transcription 3 (acute-phase response factor)	3	0.0449	0.0834	CSRP1,CDK4,AKT1	ENST00000527662,ENST00000552713,ENST00000682269
HPNE down-regulated lncRNA	TFAP2A	transcription factor AP-2 alpha (activating enhancer binding protein 2 alpha)	2	0.0595	0.0967	POLD2,COL1A1	ENST00000489883,ENST00000486572
HPNE down-regulated lncRNA	ESR1	estrogen receptor 1	2	0.067	0.0968	CDK4,CTNNB1	ENST00000552713,ENST00000643865
HPNE down-regulated lncRNA	RELA	v-rel reticuloendotheliosis viral oncogene homolog A (avian)	4	0.0873	0.105	CDK4,COL1A1,AKT1,HDAC1	ENST00000552713,ENST00000486572,ENST00000682269,ENST00000476391
HPNE down-regulated lncRNA	NFKB1	nuclear factor of kappa light polypeptide gene enhancer in B-cells 1	4	0.0889	0.105	HDAC1,AKT1,CDK4,COL1A1	ENST00000476391,ENST00000682269,ENST00000552713,ENST00000486572
HPNE down-regulated lncRNA	SP1	Sp1 transcription factor	5	0.123	0.131	CDH2,PTTG1,CDK4,POLD2,COL1A1	ENST00000676041,ENST00000523659,ENST00000552713,ENST00000489883,ENST00000486572
HPNE down-regulated lncRNA	SP3	Sp3 transcription factor	2	0.131	0.131	COL1A1,CDH2	ENST00000486572,ENST00000676041
HPNE up-regulated mRNA	ATM	ataxia telangiectasia mutated	4	0.000126	0.00654	FAS,SP1,CDKN1A,GADD45A	ENST00000355279,ENST00000357339,ENST00000327443,ENST00000373711,ENST00000405375,ENST00000617962,ENST00000370985
HPNE up-regulated mRNA	BCL6	B-cell CLL/lymphoma 6	3	0.00103	0.0244	LITAF,SUMO1,CDKN1A	ENST00000339430,ENST00000409368,ENST00000373711,ENST00000405375
HPNE up-regulated mRNA	ETV6	ets variant 6	2	0.00141	0.0244	CDKN1A,BBC3	ENST00000373711,ENST00000405375,ENST00000449228
HPNE up-regulated mRNA	TP53	tumor protein p53	7	0.00375	0.0311	FAS,GDF15,ATF3,BBC3,GADD45A,CDKN1A,BTG2	ENST00000355279,ENST00000357339,ENST00000252809,ENST00000341491,ENST00000449228,ENST00000617962,ENST00000370985,ENST00000373711,ENST00000405375,ENST00000290551
HPNE up-regulated mRNA	MYBL2	v-myb myeloblastosis viral oncogene homolog (avian)-like 2	2	0.00385	0.0311	NCL,SP1	ENST00000453992,ENST00000327443
HPNE up-regulated mRNA	EGR1	early growth response 1	5	0.0042	0.0311	GDF15,SLC4A2,ATF3,CDKN1A,FAS	ENST00000252809,ENST00000392826,ENST00000341491,ENST00000373711,ENST00000405375,ENST00000355279,ENST00000357339
HPNE up-regulated mRNA	BRCA1	breast cancer 1, early onset	4	0.00489	0.0311	CDKN1A,GADD45A,KRT18,JAK1	ENST00000373711,ENST00000405375,ENST00000617962,ENST00000370985,ENST00000388837,ENST00000342505
HPNE up-regulated mRNA	SMAD7	SMAD family member 7	2	0.00491	0.0311	HMOX1,CDKN1A	ENST00000216117,ENST00000373711,ENST00000405375
HPNE up-regulated mRNA	YBX1	Y box binding protein 1	3	0.00549	0.0311	SUMO1,FAS,KPNA2	ENST00000409368,ENST00000355279,ENST00000357339,ENST00000330459
HPNE up-regulated mRNA	RB1	retinoblastoma 1	3	0.00602	0.0311	SP1,CDKN1A,HBP1	ENST00000327443,ENST00000373711,ENST00000405375,ENST00000222574
HPNE up-regulated mRNA	ATF2	activating transcription factor 2	3	0.00659	0.0311	CDKN1A,ATF3,FAS	ENST00000373711,ENST00000405375,ENST00000341491,ENST00000355279,ENST00000357339
HPNE up-regulated mRNA	PPARG	peroxisome proliferator-activated receptor gamma	4	0.00821	0.0335	HMOX1,CDKN1A,SAT1,GDF15	ENST00000216117,ENST00000373711,ENST00000405375,ENST00000379270,ENST00000252809
HPNE up-regulated mRNA	STAT5A	signal transducer and activator of transcription 5A	2	0.0103	0.0335	SP1,SUMO1	ENST00000327443,ENST00000409368
HPNE up-regulated mRNA	TP73	tumor protein p73	2	0.0103	0.0335	CDKN1A,BBC3	ENST00000373711,ENST00000405375,ENST00000449228
HPNE up-regulated mRNA	NR3C1	nuclear receptor subfamily 3, group C, member 1 (glucocorticoid receptor)	3	0.0106	0.0335	ETS1,CDKN1A,ATP1B1	ENST00000526145,ENST00000373711,ENST00000405375,ENST00000367815
HPNE up-regulated mRNA	TFAP2A	transcription factor AP-2 alpha (activating enhancer binding protein 2 alpha)	4	0.0106	0.0335	CDKN1A,ETS1,FAS,HMOX1	ENST00000373711,ENST00000405375,ENST00000526145,ENST00000355279,ENST00000357339,ENST00000216117
HPNE up-regulated mRNA	NFKB1	nuclear factor of kappa light polypeptide gene enhancer in B-cells 1	9	0.0113	0.0335	NOLC1,CTSB,ATF3,CDKN1A,KDM2A,BIRC2,BTG2,HMOX1,FAS	ENST00000370007,ENST00000678145,ENST00000341491,ENST00000373711,ENST00000405375,ENST00000530342,ENST00000532672,ENST00000290551,ENST00000216117,ENST00000355279,ENST00000357339
HPNE up-regulated mRNA	TCF3	transcription factor 3	2	0.0119	0.0335	BBC3,CDKN1A	ENST00000449228,ENST00000373711,ENST00000405375
HPNE up-regulated mRNA	KLF4	Kruppel-like factor 4 (gut)	3	0.0122	0.0335	ATF3,CDKN1A,GDF15	ENST00000341491,ENST00000373711,ENST00000405375,ENST00000252809
HPNE up-regulated mRNA	NRF1	nuclear respiratory factor 1	2	0.0136	0.035	SNRPN,CAPNS1	ENST00000577565,ENST00000588815
HPNE up-regulated mRNA	ETS1	v-ets erythroblastosis virus E26 oncogene homolog 1 (avian)	4	0.0152	0.035	CDKN1A,CTSB,RHOC,HMOX1	ENST00000373711,ENST00000405375,ENST00000678145,ENST00000425265,ENST00000216117
HPNE up-regulated mRNA	ATF3	activating transcription factor 3	2	0.0155	0.035	ASNS,GDF15	ENST00000444334,ENST00000252809
HPNE up-regulated mRNA	NFE2L2	nuclear factor (erythroid-derived 2)-like 2	2	0.0155	0.035	GSS,HMOX1	ENST00000651619,ENST00000216117
HPNE up-regulated mRNA	MYCN	v-myc myelocytomatosis viral related oncogene, neuroblastoma derived (avian)	3	0.0168	0.0364	CDKN1A,TP53INP1,MCM4	ENST00000373711,ENST00000405375,ENST00000342697,ENST00000649838
HPNE up-regulated mRNA	STAT1	signal transducer and activator of transcription 1, 91kDa	4	0.0186	0.0387	CDKN1A,CTSB,FAS,HMOX1	ENST00000373711,ENST00000405375,ENST00000678145,ENST00000355279,ENST00000357339,ENST00000216117
HPNE up-regulated mRNA	KLF6	Kruppel-like factor 6	2	0.0237	0.0457	ATF3,CDKN1A	ENST00000341491,ENST00000373711,ENST00000405375
HPNE up-regulated mRNA	NFYA	nuclear transcription factor Y, alpha	2	0.0237	0.0457	GADD45A,FAS	ENST00000617962,ENST00000370985,ENST00000355279,ENST00000357339
HPNE up-regulated mRNA	AR	androgen receptor	4	0.0259	0.0481	HMOX1,BSG,CDKN1A,BTG2	ENST00000216117,ENST00000353555,ENST00000373711,ENST00000405375,ENST00000290551
HPNE up-regulated mRNA	SP1	Sp1 transcription factor	11	0.0279	0.0501	SLC4A2,RPS3A,CTSB,NFKB2,BSG,SNRPN,KRT18,UGDH,CDKN1A,FAS,SLC3A2	ENST00000392826,ENST00000506126,ENST00000678145,ENST00000652277,ENST00000353555,ENST00000577565,ENST00000388837,ENST00000506179,ENST00000373711,ENST00000405375,ENST00000355279,ENST00000357339,ENST00000539891,ENST00000680297
HPNE up-regulated mRNA	RELA	v-rel reticuloendotheliosis viral oncogene homolog A (avian)	8	0.0296	0.0512	FAS,BIRC2,CTSB,BTG2,CDKN1A,KDM2A,NOLC1,HMOX1	ENST00000355279,ENST00000357339,ENST00000532672,ENST00000678145,ENST00000290551,ENST00000373711,ENST00000405375,ENST00000530342,ENST00000370007,ENST00000216117
HPNE up-regulated mRNA	POU5F1	POU class 5 homeobox 1	2	0.0334	0.0557	CDKN1A,GADD45A	ENST00000373711,ENST00000405375,ENST00000617962,ENST00000370985
HPNE up-regulated mRNA	JUN	jun proto-oncogene	5	0.0343	0.0557	CDKN1A,FAS,ETS1,ATF3,NFKB2	ENST00000373711,ENST00000405375,ENST00000355279,ENST00000357339,ENST00000526145,ENST00000341491,ENST00000652277
HPNE up-regulated mRNA	CEBPB	CCAAT/enhancer binding protein (C/EBP), beta	3	0.0356	0.0561	GDF15,CDKN1A,ASNS	ENST00000252809,ENST00000373711,ENST00000405375,ENST00000444334
HPNE up-regulated mRNA	RARA	retinoic acid receptor, alpha	2	0.0388	0.0593	ETS1,CDKN1A	ENST00000526145,ENST00000373711,ENST00000405375
HPNE up-regulated mRNA	HDAC2	histone deacetylase 2	2	0.0415	0.06	SP1,CDKN1A	ENST00000327443,ENST00000373711,ENST00000405375
HPNE up-regulated mRNA	SREBF1	sterol regulatory element binding transcription factor 1	2	0.0415	0.06	HMOX1,FAS	ENST00000216117,ENST00000355279,ENST00000357339
HPNE up-regulated mRNA	CDX2	caudal type homeobox 2	2	0.0564	0.0793	CDKN1A,SP1	ENST00000373711,ENST00000405375,ENST00000327443
HPNE up-regulated mRNA	JUND	jun D proto-oncogene	2	0.0629	0.085	CDKN1A,GADD45A	ENST00000373711,ENST00000405375,ENST00000617962,ENST00000370985
HPNE up-regulated mRNA	ESR1	estrogen receptor 1	3	0.0637	0.085	BTG2,SP1,CDKN1A	ENST00000290551,ENST00000327443,ENST00000373711,ENST00000405375
HPNE up-regulated mRNA	ATF4	activating transcription factor 4 (tax-responsive enhancer element B67)	2	0.0662	0.086	ATF3,ASNS	ENST00000341491,ENST00000444334
HPNE up-regulated mRNA	POU2F1	POU class 2 homeobox 1	2	0.0764	0.0969	TXNRD1,GADD45A	ENST00000526950,ENST00000526390,ENST00000617962,ENST00000370985
HPNE up-regulated mRNA	CREB1	cAMP responsive element binding protein 1	3	0.0946	0.117	HMOX1,LAPTM4B,NOLC1	ENST00000216117,ENST00000619747,ENST00000370007
HPNE up-regulated mRNA	USF2	upstream transcription factor 2, c-fos interacting	2	0.11	0.133	CTSB,HMOX1	ENST00000678145,ENST00000216117
HPNE up-regulated mRNA	SIRT1	sirtuin 1	2	0.114	0.134	HYOU1,CDKN1A	ENST00000612687,ENST00000530473,ENST00000373711,ENST00000405375
HPNE up-regulated mRNA	MYC	v-myc myelocytomatosis viral oncogene homolog (avian)	3	0.12	0.138	ATF3,RCC1,CDKN1A	ENST00000341491,ENST00000649185,ENST00000373711,ENST00000405375
HPNE up-regulated mRNA	WT1	Wilms tumor 1	2	0.15	0.17	ETS1,CDKN1A	ENST00000526145,ENST00000373711,ENST00000405375
HPNE up-regulated mRNA	SP3	Sp3 transcription factor	3	0.155	0.172	CDKN1A,CTSB,BSG	ENST00000373711,ENST00000405375,ENST00000678145,ENST00000353555
HPNE up-regulated mRNA	USF1	upstream transcription factor 1	2	0.184	0.199	HMOX1,CTSB	ENST00000216117,ENST00000678145
HPNE up-regulated mRNA	HDAC1	histone deacetylase 1	2	0.21	0.223	SP1,CDKN1A	ENST00000327443,ENST00000373711,ENST00000405375
HPNE up-regulated mRNA	E2F1	E2F transcription factor 1	3	0.219	0.227	BBC3,CDKN1A,TP53INP1	ENST00000449228,ENST00000373711,ENST00000405375,ENST00000342697
HPNE up-regulated mRNA	STAT3	signal transducer and activator of transcription 3 (acute-phase response factor)	3	0.244	0.249	FAS,CDKN1A,HMOX1	ENST00000355279,ENST00000357339,ENST00000373711,ENST00000405375,ENST00000216117
HPNE up-regulated mRNA	YY1	YY1 transcription factor	2	0.299	0.299	FAS,SNRPN	ENST00000355279,ENST00000357339,ENST00000577565
HPNE down-regulated mRNA	SOX6	SRY (sex determining region Y)-box 6	3	2.58e-05	0.000927	CTNNB1,TP53,CDK4	ENST00000645927,ENST00000396185,ENST00000269305,ENST00000312990
HPNE down-regulated mRNA	MSC	musculin	3	0.000204	0.00367	MCM7,CDC6,MMP2	ENST00000621318,ENST00000649662,ENST00000543485
HPNE down-regulated mRNA	MYCN	v-myc myelocytomatosis viral related oncogene, neuroblastoma derived (avian)	4	0.0015	0.018	HLA-A,MCM7,DDB1,TP53	ENST00000376806,ENST00000621318,ENST00000301764,ENST00000269305
HPNE down-regulated mRNA	TP53	tumor protein p53	7	0.00231	0.0183	TP53,MKI67,DDB1,CDK4,CTNNB1,MCM7,MMP2	ENST00000269305,ENST00000368653,ENST00000301764,ENST00000312990,ENST00000645927,ENST00000396185,ENST00000621318,ENST00000543485
HPNE down-regulated mRNA	TWIST2	twist basic helix-loop-helix transcription factor 2	3	0.00254	0.0183	FN1,CTPS1,MMP2	ENST00000354785,ENST00000432072,ENST00000456923,ENST00000649215,ENST00000543485
HPNE down-regulated mRNA	YBX1	Y box binding protein 1	3	0.0043	0.0258	CDKN3,MMP2,KPNA2	ENST00000335183,ENST00000543485,ENST00000677086
HPNE down-regulated mRNA	TWIST1	twist basic helix-loop-helix transcription factor 1	3	0.00666	0.0343	MMP2,CTPS1,FN1	ENST00000543485,ENST00000649215,ENST00000354785,ENST00000432072,ENST00000456923
HPNE down-regulated mRNA	E2F3	E2F transcription factor 3	2	0.00871	0.0363	CDC6,AURKA	ENST00000649662,ENST00000347343
HPNE down-regulated mRNA	ESR1	estrogen receptor 1	4	0.00991	0.0363	TP53,CDK4,SP1,CTNNB1	ENST00000269305,ENST00000312990,ENST00000426431,ENST00000645927,ENST00000396185
HPNE down-regulated mRNA	NF1	neurofibromin 1	2	0.0101	0.0363	TP53,DDB1	ENST00000269305,ENST00000301764
HPNE down-regulated mRNA	SATB1	SATB homeobox 1	2	0.0116	0.0378	MKI67,CDK4	ENST00000368653,ENST00000312990
HPNE down-regulated mRNA	ATF3	activating transcription factor 3	2	0.0131	0.0393	TP53,MMP2	ENST00000269305,ENST00000543485
HPNE down-regulated mRNA	HMGA1	high mobility group AT-hook 1	2	0.0148	0.0408	SP1,TP53	ENST00000426431,ENST00000269305
HPNE down-regulated mRNA	E2F1	E2F transcription factor 1	5	0.0165	0.0424	TP53,CDC6,AURKB,AURKA,RACGAP1	ENST00000269305,ENST00000649662,ENST00000534871,ENST00000347343,ENST00000551016
HPNE down-regulated mRNA	IRF1	interferon regulatory factor 1	3	0.0187	0.0448	TP53,CDK4,HLA-A	ENST00000269305,ENST00000312990,ENST00000376806
HPNE down-regulated mRNA	HDAC3	histone deacetylase 3	2	0.0285	0.064	GTF2I,MMP2	ENST00000573035,ENST00000543485
HPNE down-regulated mRNA	SRF	serum response factor (c-fos serum response element-binding transcription factor)	2	0.0307	0.0651	MMP2,LMO7	ENST00000543485,ENST00000526202
HPNE down-regulated mRNA	HDAC2	histone deacetylase 2	2	0.0354	0.0709	PHB,SP1	ENST00000511832,ENST00000426431
HPNE down-regulated mRNA	HDAC1	histone deacetylase 1	3	0.0437	0.0812	PHB,SP1,TP53	ENST00000511832,ENST00000426431,ENST00000269305
HPNE down-regulated mRNA	ATF2	activating transcription factor 2	2	0.0483	0.0812	FN1,MMP2	ENST00000354785,ENST00000432072,ENST00000456923,ENST00000543485
HPNE down-regulated mRNA	ETS2	v-ets erythroblastosis virus E26 oncogene homolog 2 (avian)	2	0.0483	0.0812	TP53,MMP2	ENST00000269305,ENST00000543485
HPNE down-regulated mRNA	RELA	v-rel reticuloendotheliosis viral oncogene homolog A (avian)	7	0.0496	0.0812	CDK4,BIRC2,RGS4,MMP2,TP53,HLA-A,FN1	ENST00000312990,ENST00000227758,ENST00000367909,ENST00000543485,ENST00000269305,ENST00000376806,ENST00000354785,ENST00000432072,ENST00000456923
HPNE down-regulated mRNA	HIF1A	hypoxia inducible factor 1, alpha subunit (basic helix-loop-helix transcription factor)	3	0.0639	0.0944	MMP2,ENO1,ALDOA	ENST00000543485,ENST00000234590,ENST00000412304,ENST00000642816
HPNE down-regulated mRNA	NR3C1	nuclear receptor subfamily 3, group C, member 1 (glucocorticoid receptor)	2	0.0656	0.0944	TP53,CDK4	ENST00000269305,ENST00000312990
HPNE down-regulated mRNA	EZH2	enhancer of zeste homolog 2 (Drosophila)	2	0.0718	0.0944	MMP2,TP53	ENST00000543485,ENST00000269305
HPNE down-regulated mRNA	KLF4	Kruppel-like factor 4 (gut)	2	0.0718	0.0944	MMP2,TP53	ENST00000543485,ENST00000269305
HPNE down-regulated mRNA	STAT3	signal transducer and activator of transcription 3 (acute-phase response factor)	4	0.0723	0.0944	PHB,MMP2,CDK4,TP53	ENST00000511832,ENST00000543485,ENST00000312990,ENST00000269305
HPNE down-regulated mRNA	EGR1	early growth response 1	3	0.0734	0.0944	FN1,STMN1,TP53	ENST00000354785,ENST00000432072,ENST00000456923,ENST00000455785,ENST00000269305
HPNE down-regulated mRNA	CREB1	cAMP responsive element binding protein 1	3	0.0774	0.096	MMP2,STMN1,LAPTM4B	ENST00000543485,ENST00000455785,ENST00000521545
HPNE down-regulated mRNA	AR	androgen receptor	3	0.0835	0.1	CDC6,FN1,CTNNB1	ENST00000649662,ENST00000354785,ENST00000432072,ENST00000456923,ENST00000645927,ENST00000396185
HPNE down-regulated mRNA	SIRT1	sirtuin 1	2	0.0981	0.111	CTNNB1,TP53	ENST00000645927,ENST00000396185,ENST00000269305
HPNE down-regulated mRNA	MYC	v-myc myelocytomatosis viral oncogene homolog (avian)	3	0.0985	0.111	TP53,HLA-A,CDK4	ENST00000269305,ENST00000376806,ENST00000312990
HPNE down-regulated mRNA	NFKB1	nuclear factor of kappa light polypeptide gene enhancer in B-cells 1	6	0.119	0.13	MMP2,FN1,BIRC2,TP53,CDK4,RGS4	ENST00000543485,ENST00000354785,ENST00000432072,ENST00000456923,ENST00000227758,ENST00000269305,ENST00000312990,ENST00000367909
HPNE down-regulated mRNA	TFAP2A	transcription factor AP-2 alpha (activating enhancer binding protein 2 alpha)	2	0.184	0.195	OAT,MMP2	ENST00000539214,ENST00000543485
HPNE down-regulated mRNA	JUN	jun proto-oncogene	3	0.227	0.233	MMP2,STMN1,TP53	ENST00000543485,ENST00000455785,ENST00000269305
HPNE down-regulated mRNA	SP1	Sp1 transcription factor	6	0.42	0.42	MMP2,CDK4,UGDH,OAT,DDB1,CD99	ENST00000543485,ENST00000312990,ENST00000316423,ENST00000501493,ENST00000539214,ENST00000301764,ENST00000381187
PANC-1 up-regulated lncRNA	MYC	v-myc myelocytomatosis viral oncogene homolog (avian)	3	0.0025	0.0124	VEGFA,CDCA7,HLA-C	ENST00000497139,ENST00000496441,ENST00000487245
PANC-1 up-regulated lncRNA	SP3	Sp3 transcription factor	3	0.00353	0.0124	CBS,YY1,VEGFA	ENST00000461686,ENST00000623799,ENST00000497139
PANC-1 up-regulated lncRNA	SP1	Sp1 transcription factor	5	0.00874	0.0176	CBS,ATP2C1,VEGFA,YY1,PHGDH	ENST00000461686,ENST00000514654,ENST00000497139,ENST00000623799,ENST00000642021
PANC-1 up-regulated lncRNA	EP300	E1A binding protein p300	2	0.01	0.0176	VEGFA,YY1	ENST00000497139,ENST00000623799
PANC-1 up-regulated lncRNA	E2F1	E2F transcription factor 1	2	0.0509	0.0713	CDCA7,VEGFA	ENST00000496441,ENST00000497139
PANC-1 up-regulated lncRNA	RELA	v-rel reticuloendotheliosis viral oncogene homolog A (avian)	2	0.195	0.197	VEGFA,YY1	ENST00000497139,ENST00000623799
PANC-1 up-regulated lncRNA	NFKB1	nuclear factor of kappa light polypeptide gene enhancer in B-cells 1	2	0.197	0.197	VEGFA,YY1	ENST00000497139,ENST00000623799
PANC-1 down-regulated lncRNA	MYCN	v-myc myelocytomatosis viral related oncogene, neuroblastoma derived (avian)	2	0.00789	0.0237	HLA-A,CLU	ENST00000479320,ENST00000461903,ENST00000522299
PANC-1 down-regulated lncRNA	MYC	v-myc myelocytomatosis viral oncogene homolog (avian)	2	0.0356	0.0512	LDHA,HLA-A	ENST00000375710,ENST00000479320,ENST00000461903
PANC-1 down-regulated lncRNA	SP1	Sp1 transcription factor	4	0.0512	0.0512	CERS2,HRAS,DRG2,LDHA	ENST00000460664,ENST00000479482,ENST00000497744,ENST00000375710
PANC-1 up-regulated mRNA	DDIT3	DNA-damage-inducible transcript 3	2	0.00953	0.105	RTN3,ASNS	ENST00000339997,ENST00000444334
PANC-1 up-regulated mRNA	HIF1A	hypoxia inducible factor 1, alpha subunit (basic helix-loop-helix transcription factor)	3	0.0315	0.158	TUBB3,SLC29A1,ENO1	ENST00000554444,ENST00000652680,ENST00000234590
PANC-1 up-regulated mRNA	EZH2	enhancer of zeste homolog 2 (Drosophila)	2	0.0432	0.158	RPLP0,KPNB1	ENST00000551150,ENST00000583648
PANC-1 up-regulated mRNA	SIRT1	sirtuin 1	2	0.0598	0.165	CTNNB1,NBN	ENST00000441708,ENST00000265433
PANC-1 up-regulated mRNA	E2F1	E2F transcription factor 1	3	0.0997	0.219	CDC6,RACGAP1,UHRF1	ENST00000649662,ENST00000547905,ENST00000615884
PANC-1 up-regulated mRNA	ESR1	estrogen receptor 1	2	0.131	0.239	PTMA,CTNNB1	ENST00000412128,ENST00000441708
PANC-1 up-regulated mRNA	AR	androgen receptor	2	0.18	0.276	CDC6,CTNNB1	ENST00000649662,ENST00000441708
PANC-1 up-regulated mRNA	MYC	v-myc myelocytomatosis viral oncogene homolog (avian)	2	0.2	0.276	PTBP1,ODC1	ENST00000589575,ENST00000405333
PANC-1 up-regulated mRNA	JUN	jun proto-oncogene	2	0.35	0.387	APP,NAMPT	ENST00000359726,ENST00000424768
PANC-1 up-regulated mRNA	SP1	Sp1 transcription factor	5	0.351	0.387	RPS3A,APP,SLC29A1,ODC1,GSPT1	ENST00000512797,ENST00000359726,ENST00000652680,ENST00000405333,ENST00000563468
PANC-1 up-regulated mRNA	TP53	tumor protein p53	2	0.394	0.394	CTNNB1,UHRF1	ENST00000441708,ENST00000615884
PANC-1 down-regulated mRNA	MYCN	v-myc myelocytomatosis viral related oncogene, neuroblastoma derived (avian)	3	0.00677	0.0609	CD44,DDB1,HDAC2	ENST00000526000,ENST00000680075,ENST00000519108
PANC-1 down-regulated mRNA	TWIST2	twist basic helix-loop-helix transcription factor 2	2	0.0193	0.0869	ITGB1,CD44	ENST00000417122,ENST00000480226,ENST00000526000
PANC-1 down-regulated mRNA	TWIST1	twist basic helix-loop-helix transcription factor 1	2	0.0362	0.104	ITGB1,CD44	ENST00000417122,ENST00000480226,ENST00000526000
PANC-1 down-regulated mRNA	EZH2	enhancer of zeste homolog 2 (Drosophila)	2	0.0462	0.104	RPLP0,KPNB1	ENST00000228306,ENST00000290158
PANC-1 down-regulated mRNA	PPARG	peroxisome proliferator-activated receptor gamma	2	0.11	0.198	ATP2A2,ACAT1	ENST00000308664,ENST00000673531
PANC-1 down-regulated mRNA	JUN	jun proto-oncogene	3	0.137	0.205	APP,ETS2,STMN1	ENST00000348990,ENST00000666778,ENST00000667466,ENST00000357865,ENST00000374291
PANC-1 down-regulated mRNA	STAT1	signal transducer and activator of transcription 1, 91kDa	2	0.163	0.207	ACAT1,APP	ENST00000673531,ENST00000348990
PANC-1 down-regulated mRNA	YY1	YY1 transcription factor	2	0.184	0.207	DEK,HDAC2	ENST00000507591,ENST00000519108
PANC-1 down-regulated mRNA	SP1	Sp1 transcription factor	6	0.22	0.22	CD44,RPS3A,APP,SLC29A1,ATP2A2,DDB1	ENST00000526000,ENST00000512690,ENST00000348990,ENST00000652453,ENST00000308664,ENST00000680075
