# Supplementary material for: Characterization of H2O2-Induced Alterations in Global Transcription of mRNA and lncRNA
Source: Antioxidants (Basel). 2022 Mar 3;11(3):495. doi: 10.3390/antiox11030495 (PMC8944526; doi:10.3390/antiox11030495)
Supplement: Supplementary file 1 [file antioxidants-11-00495-s001.zip › Supplementary Materials/Table S3. qPCR primer list.xlsx]

## Sheet: Sheet1
Table S3. qPCR primer list
Primer name	Sequence (5'-3')
ARNT2-qPCR-F	ATGGCGCGTACAAGCCTTC
ARNT2-qPCR-R	AGTCAGACACATAAATCACTCGC
BIRC3-qPCR-F	AAGCTACCTCTCAGCCTACTTT
BIRC3-qPCR-R	CCACTGTTTTCTGTACCCGGA
CCNT1-qPCR-F	ACAACAAACGGTGGTATTTCACT
CCNT1-qPCR-R	CCTGCTGGCGATAAGAAAGTT
CCNT2-qPCR-F	GGAGTGGAGGCGGATAAAGAG
CCNT2-qPCR-R	AGAGACATTGAGACGCTGTCC
CDKN1A-qPCR-F	TGTCCGTCAGAACCCATGC
CDKN1A-qPCR-R	AAAGTCGAAGTTCCATCGCTC
CSF2-qPCR-F	TCCTGAACCTGAGTAGAGACAC
CSF2-qPCR-R	TGCTGCTTGTAGTGGCTGG
CXCL8-qPCR-F	TTTTGCCAAGGAGTGCTAAAGA
CXCL8-qPCR-R	AACCCTCTGCACCCAGTTTTC
DUSP6-qPCR-F	GAAATGGCGATCAGCAAGACG
DUSP6-qPCR-R	CGACGACTCGTATAGCTCCTG
ENSG00000282988-qPCR-F	CAACATCCAGGCTGTACT
ENSG00000282988-qPCR-R	GCCATTGCGAACTTCTAA
ERG-qPCR-F	CGTGCCAGCAGATCCTACG
ERG-qPCR-R	GGTGAGCCTCTGGAAGTCG
ETV7-qPCR-F	CTGCTGTGGGATTACGTGTATC
ETV7-qPCR-R	GTTCTTGTGATTTCCCCAGAGTC
FLT1-qPCR-F	TTTGCCTGAAATGGTGAGTAAGG
FLT1-qPCR-R	TGGTTTGCTTGAGCTGTGTTC
FLT3-qPCR-F	AGGGACAGTGTACGAAGCTG
FLT3-qPCR-R	GCTGTGCTTAAAGACCCAGAG
FOXO1-qPCR-F	TCGTCATAATCTGTCCCTACACA
FOXO1-qPCR-R	CGGCTTCGGCTCTTAGCAAA
GRIA3-qPCR-F	TCCGGGCGGTCTTCTTTTTAG
GRIA3-qPCR-R	TCCACCTATGCTGATGGTGTT
H3-7-qPCR-F	CGCTATCAGAAGTCTACG
H3-7-qPCR-R	CAGGTCCGTCTTAAACTC
H3C10-qPCR-F	AGATTCGCCGCTACCAGA
H3C10-qPCR-R	CGATCTCACGCACCAGAC
H3C11-qPCR-F	ATGGCACGAACAAAGCAAACA
H3C11-qPCR-R	GCGATCTCCCGTACCAAGC
H3C1-qPCR-F	ACTGCTCGGAAGTCTACTGGT
H3C1-qPCR-R	GCGCTGGAAAGGTAGTTTACGA
H3C12-qPCR-F	GCTGCTCATCCGCAAACTG
H3C12-qPCR-R	GCGTGAATAGCACAGAGGTTG
H3C13-qPCR-F	GCTACCAGAAGTCTACGG
H3C13-qPCR-R	GTCCGTCTTAAAGTCCTG
H3C14-qPCR-F	CGCGCAGGACTTTAAGACG
H3C14-qPCR-R	GCATAATGGTCACGCGCTTG
H3C15-qPCR-F	TACCTGGTGGGGCTGTTC
H3C15-qPCR-R	ATGTCCTTGGGCATAATGG
H3C2-qPCR-F	ATGGCTCGTACTAAACAGACAGC
H3C2-qPCR-R	TTCCGAATCAGCAACTCGGTC
H3C3-qPCR-F	GCTTGCTACTAAAGCAGCCC
H3C3-qPCR-R	AGCGCACAGATTGGTGTCTTC
H3C4-qPCR-F	CCATTCCAGCGTCTAGTCCG
H3C4-qPCR-R	TCTGAAAACGCAGATCAGTCTTG
H3C8-qPCR-F	CAGACTGCACGCAAGTCCA
H3C8-qPCR-R	CGGAACTCTGAAAGCGCAGAT
IGF1-qPCR-F	GCTCTTCAGTTCGTGTGTGGA
IGF1-qPCR-R	GCCTCCTTAGATCACAGCTCC
IL1R2-qPCR-F	ATGTTGCGCTTGTACGTGTTG
IL1R2-qPCR-R	CCCGCTTGTAATGCCTCCC
IL2RB-qPCR-F	CAGCGGTGAATGGCACTTC
IL2RB-qPCR-R	GGCATGGACTTGGCAGGAA
LMO2-qPCR-F	GGCCATCGAAAGGAAGAGCC
LMO2-qPCR-R	GGCCCAGTTTGTAGTAGAGGC
LYL1-qPCR-F	ACAGTGTCTACATTGGGCCAG
LYL1-qPCR-R	GGCTGCTAGGGAAGATGCT
MDM2-qPCR-F	GAATCATCGGACTCAGGTACATC
MDM2-qPCR-R	TCTGTCTCACTAATTGCTCTCCT
MMP3-qPCR-F	AGTCTTCCAATCCTACTGTTGCT
MMP3-qPCR-R	TCCCCGTCACCTCCAATCC
NR4A3-qPCR-F	TGCGTCCAAGCCCAATATAGC
NR4A3-qPCR-R	GGTGTATTCCGAGCTGTATGTCT
NSD2-qPCR-F	ACCGCGAGTGTTCTGTGTTC
NSD2-qPCR-R	GTCGTGGCCGTTAAACTTCTG
PAX7-qPCR-F	ACCCCTGCCTAACCACATC
PAX7-qPCR-R	GCGGCAAAGAATCTTGGAGAC
RUNX1T1-qPCR-F	ATGCCAGACTCACCTGTGGAT
RUNX1T1-qPCR-R	GGCTGTAGGAGAATGGCTCG
SPI1-qPCR-F	GTGCCCTATGACACGGATCTA
SPI1-qPCR-R	AGTCCCAGTAATGGTCGCTAT
SPINT1-qPCR-F	AACTTGGCGCTAGTGGAGC
SPINT1-qPCR-R	TTCCCTCGTGAGGTAGTTGAT
SSX2-qPCR-F	AGACGCGGAACAGCTCATC
SSX2-qPCR-R	CATGAACTGCACCCATAGAAGT
TP53-qPCR-F	CAGCACATGACGGAGGTTGT
TP53-qPCR-R	TCATCCAAATACTCCACACGC
WNT16-qPCR-F	TTCAGACACGAGAGATGGAACT
WNT16-qPCR-R	CCAGCCTTCACTTGCTGAG
H3C7-qPCR-F	TACTGTCGCCCTCCGTGAAA
H3C7-qPCR-R	CACCAGGTAAGCCTCGCAG
BAIAP3-qPCR-F	GCTTCAGCGACCCATACTG
BAIAP3-qPCR-R	GCTGGTCCGTGCTCACATC
BMI1-qPCR-F	CCACCTGATGTGTGTGCTTTG
BMI1-qPCR-R	TTCAGTAGTGGTCTGGTCTTGT
CCND2-qPCR-F	ACCTTCCGCAGTGCTCCTA
CCND2-qPCR-R	CCCAGCCAAGAAACGGTCC
CCR7-qPCR-F	TGAGGTCACGGACGATTACAT
CCR7-qPCR-R	GTAGGCCCACGAAACAAATGAT
CD14-qPCR-F	ACGCCAGAACCTTGTGAGC
CD14-qPCR-R	GCATGGATCTCCACCTCTACTG
CDKN2C-qPCR-F	GGGGACCTAGAGCAACTTACT
CDKN2C-qPCR-R	CAGCGCAGTCCTTCCAAAT
CSF1R-qPCR-F	GGGAATCCCAGTGATAGAGCC
CSF1R-qPCR-R	TTGGAAGGTAGCGTTGTTGGT
H3C6-qPCR-F	ACTAAGCAGACGGCTCGTAAA
H3C6-qPCR-R	CGGATTAGAAGCTCGGTAGACT
HOXA11-qPCR-F	TGCCAAGTTGTACTTACTACGTC
HOXA11-qPCR-R	GTTGGAGGAGTAGGAGTATGTCA
HPGD-qPCR-F	CAGCGTTGGCTGCTAATCTTA
HPGD-qPCR-R	AGCCTGGACAAATGGCATTCA
JUP-qPCR-F	TCGCCATCTTCAAGTCGGG
JUP-qPCR-R	AGGGGCACCATCTTTTGCAG
NGFR-qPCR-F	CCTACGGCTACTACCAGGATG
NGFR-qPCR-R	CACACGGTGTTCTGCTTGT
NTRK1-qPCR-F	AACCTCACCATCGTGAAGAGT
NTRK1-qPCR-R	TGAAGGAGAGATTCAGGCGAC
NUPR1-qPCR-F	CTCTCATCATGCCTATGCCTACT
NUPR1-qPCR-R	CCTCCACCTCCTGTAACCAAG
PAX8-qPCR-F	ATCCGGCCTGGAGTGATAGG
PAX8-qPCR-R	TGGCGTTTGTAGTCCCCAATC
TMPRSS2-qPCR-F	GTCCCCACTGTCTACGAGGT
TMPRSS2-qPCR-R	CAGACGACGGGGTTGGAAG
ZBTB16-qPCR-F	GAGATCCTCTTCCACCGCAAT
ZBTB16-qPCR-R	CCGCATACAGCAGGTCATC
COMMD3-BMI1-qPCR-F	GAACAACGAGAATCAAGA
COMMD3-BMI1-qPCR-R	AGGTAACGAACAATACAC
ACTB-qPCR-F	CATGTACGTTGCTATCCAGGC
ACTB-qPCR-R	CTCCTTAATGTCACGCACGAT
